# Supplementary figures and images for: Purinyl N-directed aroylation of 6-arylpurine ribo- and 2′-deoxyribonucleosides, and mechanistic insights
Source: Royal Society of Chemistry journal article supplement (doi:10.1039/d4ob00689e), 2024-01-01

FIDs (VnmrJ) are provided for the following compounds

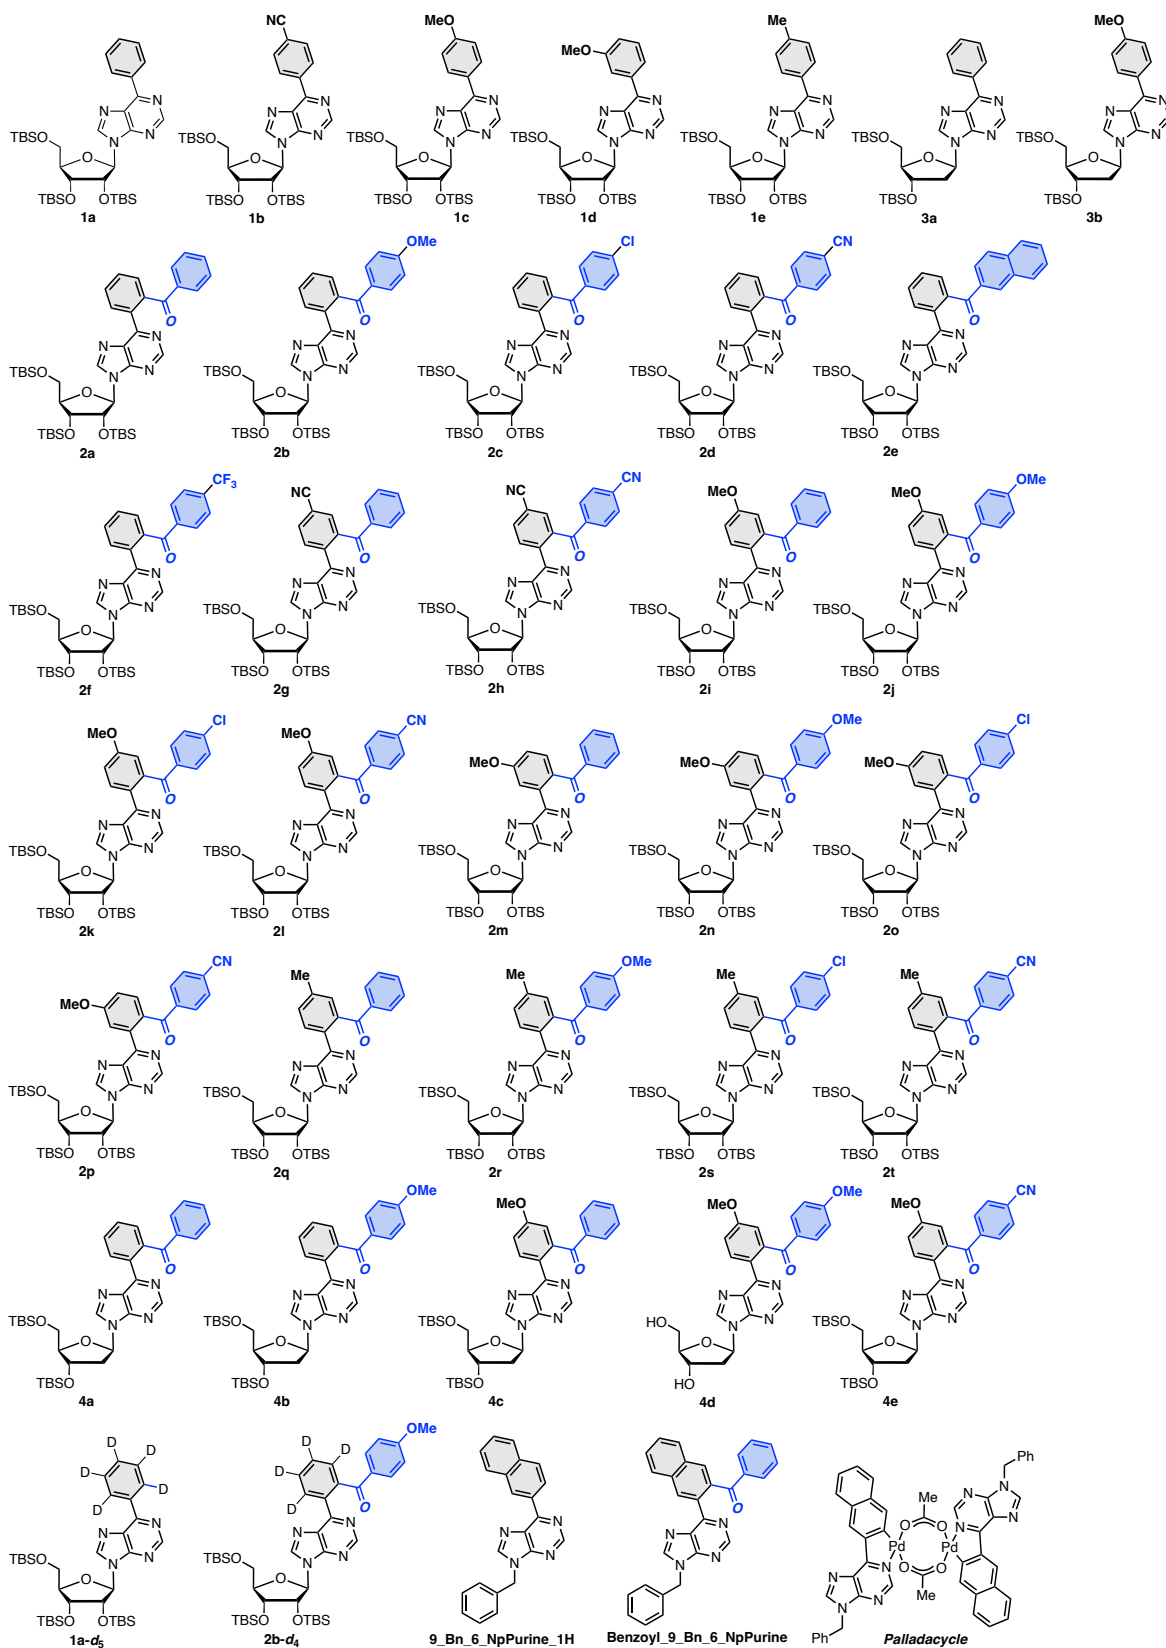

Supplement: d4ob00689e2.zip [file d4ob00689e2.zip]
